# Supplementary material for: Characterization of Nucleotide Misincorporation Patterns in the Iceman's Mitochondrial DNA
Source: PubMed Central journal article supplement (PMC2799664; doi:10.1371/journal.pone.0008629), 2010-01-08
Supplement: pone.0008629.s001.pdf [file pone.0008629.s001.pdf]

**Table S1. Ancient sequences nucleotide misincorporation calculations and nucleotide misincorporation rate within each mitochondrial fragment.**

| Mitochondrial fragment | Number of clones | Length of fragment | Number of nucleotide misincorporations | m        | AT/GC Ratio | Nucleotide misincorporation |       |       |      |      |      |       |      |      |      |        |       | Complementary Groups |       |      |      |       |      |       |
|------------------------|------------------|--------------------|----------------------------------------|----------|-------------|-----------------------------|-------|-------|------|------|------|-------|------|------|------|--------|-------|----------------------|-------|------|------|-------|------|-------|
|                        |                  |                    |                                        |          |             | A→C                         | T→C   | A→G   | T→G  | A→T  | T→A  | C→A   | G→T  | C→G  | G→C  | C→T    | G→A   | Total                | A→G   | A→T  | A→C  | C→T   | C→G  | C→A   |
|                        |                  |                    |                                        |          |             | T→C                         | T→A   | T→G   | G→A  | T→G  | G→A  | T→C   | T→A  | T→G  | G→A  | T→C    | T→A   | T→G                  | G→A   | T→C  | T→A  | T→G   | G→A  | T→C   |
| L16518/H47             | 270              | 97                 | 222                                    | 0.008477 | 1.16        | 0                           | 6     | 22    | 0    | 0    | 0    | 0     | 1.16 | 0    | 0    | 198.76 | 24.27 | 252.19               | 28    | 0    | 0    | 223   | 0    | 1.16  |
| L39/H118               | 108              | 78                 | 86                                     | 0.010209 | 0.77        | 0                           | 5.16  | 0     | 0    | 1.29 | 2.58 | 0     | 2    | 0    | 0    | 50     | 27    | 88.1                 | 5.16  | 3.87 | 0    | 77    | 0    | 2     |
| L207/H343              | 41               | 135                | 43                                     | 0.007769 | 1.45        | 1                           | 1     | 0     | 0    | 0    | 1    | 1.45  | 0    | 0    | 0    | 56.73  | 0     | 61.18                | 1     | 1    | 1    | 56.73 | 0    | 1.45  |
| L707/H809              | 220              | 101                | 181                                    | 0.008146 | 0.91        | 0                           | 8.8   | 24.2  | 0    | 1.1  | 0    | 2     | 0    | 1    | 0    | 107    | 40    | 184.22               | 33    | 1.1  | 0    | 147   | 1    | 2     |
| L1135/H1202            | 481              | 66                 | 225                                    | 0.007088 | 0.94        | 3.18                        | 13.78 | 13.78 | 2.12 | 0    | 1.06 | 11    | 4    | 0    | 0    | 102    | 76    | 227                  | 27.56 | 1.06 | 5.3  | 178   | 0    | 15    |
| L1170/H1211            | 134              | 40                 | 48                                     | 0.008955 | 0.75        | 8.1                         | 5.4   | 0     | 0    | 0    | 0    | 9     | 0    | 0    | 0    | 27     | 2     | 51.33                | 5.4   | 0    | 8.1  | 29    | 0    | 9     |
| L1177/H1238            | 112              | 61                 | 45                                     | 0.006587 | 0.97        | 1.03                        | 1.03  | 5.15  | 0    | 0    | 1.03 | 2     | 0    | 0    | 0    | 30     | 5     | 45.26                | 6.18  | 1.03 | 1.03 | 35    | 0    | 2     |
| L1361/H1493            | 19               | 131                | 10                                     | 0.004018 | 1.08        | 0                           | 2     | 1     | 0    | 0    | 0    | 0     | 0    | 0    | 0    | 1.08   | 6.48  | 10.56                | 3     | 0    | 0    | 7.56  | 0    | 0     |
| L1720/H1833            | 62               | 112                | 36                                     | 0.005184 | 1.8         | 0                           | 2     | 2     | 0    | 1    | 0    | 5.4   | 3.6  | 0    | 0    | 27     | 19.8  | 60.8                 | 4     | 1    | 0    | 46.8  | 0    | 9     |
| L2643/H2746            | 76               | 112                | 52                                     | 0.006109 | 1.24        | 0                           | 6     | 2     | 0    | 0    | 0    | 0     | 1.24 | 0    | 0    | 34.72  | 18.6  | 62.56                | 8     | 0    | 0    | 53.32 | 0    | 1.24  |
| L3380/H3497            | 89               | 116                | 66                                     | 0.006393 | 1           | 0                           | 0     | 2     | 0    | 0    | 0    | 0     | 0    | 0    | 0    | 48     | 16    | 66                   | 2     | 0    | 0    | 64    | 0    | 0     |
| L3477/H3530            | 165              | 52                 | 47                                     | 0.005478 | 0.79        | 0                           | 0     | 2.52  | 0    | 0    | 0    | 6     | 0    | 0    | 0    | 38     | 1     | 47.52                | 2.52  | 0    | 0    | 39    | 0    | 6     |
| L4687/H4776            | 93               | 88                 | 41                                     | 0.005010 | 2.14        | 0                           | 1     | 6     | 0    | 0    | 0    | 0     | 0    | 0    | 0    | 70.71  | 2.14  | 79.85                | 7     | 0    | 0    | 72.85 | 0    | 0     |
| L4730/H4849            | 131              | 119                | 153                                    | 0.009815 | 1.38        | 0                           | 18    | 12    | 2    | 1    | 0    | 4.14  | 2.76 | 0    | 0    | 155.94 | 2.76  | 198.6                | 30    | 1    | 2    | 158.7 | 0    | 6.9   |
| L6951/H7074            | 155              | 122                | 120                                    | 0.006346 | 1.3         | 5                           | 9     | 16    | 0    | 2    | 1    | 0     | 1.3  | 0    | 0    | 89.83  | 22.13 | 146.26               | 25    | 3    | 5    | 112   | 0    | 1.3   |
| L6999/H7107            | 93               | 107                | 106                                    | 0.010652 | 1.33        | 1                           | 6     | 3     | 0    | 0    | 0    | 0     | 0    | 1.33 | 0    | 70.28  | 55.7  | 137.31               | 9     | 0    | 1    | 126   | 1.33 | 0     |
| L8081/H8165            | 142              | 83                 | 77                                     | 0.006533 | 1.13        | 0                           | 4     | 4     | 0    | 0    | 0    | 0     | 5.64 | 0    | 2.26 | 40.62  | 29.33 | 85.85                | 8     | 0    | 0    | 69.95 | 2.26 | 5.64  |
| L8776/H8872            | 21               | 95                 | 9                                      | 0.004511 | 0.98        | 0                           | 0     | 2.04  | 0    | 0    | 0    | 0     | 0    | 0    | 0    | 4      | 3     | 9.04                 | 2.04  | 0    | 0    | 7     | 0    | 0     |
| L8840/H8932            | 59               | 91                 | 54                                     | 0.010058 | 1.07        | 1                           | 3     | 1     | 13   | 0    | 0    | 0     | 0    | 0    | 0    | 36.32  | 2.14  | 56.46                | 4     | 0    | 14   | 38.46 | 0    | 0     |
| L9027/H9105            | 245              | 77                 | 133                                    | 0.007050 | 1.33        | 0                           | 15    | 5     | 0    | 0    | 0    | 1.33  | 0    | 0    | 0    | 144    | 5.33  | 170.66               | 20    | 0    | 0    | 149.3 | 0    | 1.33  |
| L9612/H9715            | 100              | 102                | 49                                     | 0.004804 | 1.68        | 0                           | 4     | 3     | 0    | 0    | 7    | 0     | 0    | 0    | 0    | 30.32  | 28.63 | 72.95                | 7     | 7    | 0    | 58.95 | 0    | 0     |
| L9678/H9740            | 247              | 61                 | 91                                     | 0.006040 | 1.77        | 0                           | 5     | 8     | 0    | 0    | 0    | 0     | 1.77 | 0    | 0    | 108.14 | 28.36 | 151.27               | 13    | 0    | 0    | 136.5 | 0    | 1.77  |
| L9696/H9785            | 151              | 88                 | 85                                     | 0.006397 | 1.26        | 0                           | 6     | 2     | 4    | 0    | 1    | 1.26  | 0    | 0    | 0    | 76.64  | 12.56 | 103.46               | 8     | 1    | 4    | 89.2  | 0    | 1.26  |
| L10377/H10500          | 37               | 122                | 15                                     | 0.003323 | 2.7         | 0                           | 1     | 5     | 0    | 0    | 0    | 0     | 0    | 0    | 0    | 16.18  | 8.09  | 30.27                | 6     | 0    | 0    | 24.27 | 0    | 0     |
| L10476/H10599          | 57               | 122                | 42                                     | 0.006040 | 1.9         | 0                           | 5     | 0     | 0    | 1    | 1    | 1.9   | 0    | 0    | 0    | 60.95  | 3.81  | 73.66                | 5     | 2    | 0    | 64.76 | 0    | 1.9   |
| L10545/H10646          | 142              | 100                | 104                                    | 0.007324 | 1.62        | 0                           | 3     | 10    | 0    | 0    | 1    | 0     | 0    | 0    | 0    | 129.52 | 16.19 | 159.71               | 13    | 1    | 0    | 145.7 | 0    | 0     |
| L11261/H11325          | 293              | 63                 | 213                                    | 0.011539 | 1.25        | 0                           | 3     | 8     | 0    | 0    | 1    | 1.25  | 0    | 0    | 0    | 243.75 | 6.25  | 263.25               | 11    | 1    | 0    | 250   | 0    | 1.25  |
| L11274/H11381          | 172              | 106                | 148                                    | 0.008118 | 1.72        | 0                           | 14    | 9     | 0    | 0    | 4    | 0     | 0    | 1.72 | 0    | 175.23 | 30.92 | 234.87               | 23    | 4    | 0    | 206.2 | 1.72 | 0     |
| L11408/H11536          | 60               | 108                | 42                                     | 0.006481 | 1.04        | 1                           | 5     | 2     | 0    | 0    | 1    | 0     | 1.04 | 0    | 0    | 29.06  | 4.15  | 43.25                | 7     | 1    | 1    | 33.21 | 0    | 1.04  |
| L11456/H11536          | 72               | 79                 | 31                                     | 0.005450 | 1.19        | 0                           | 0     | 2     | 0    | 0    | 1    | 0     | 2.39 | 0    | 0    | 27.47  | 3.58  | 36.44                | 2     | 1    | 0    | 31.05 | 0    | 2.39  |
| L11620/H11742          | 72               | 122                | 42                                     | 0.004781 | 1.1         | 0                           | 1     | 6     | 0    | 0    | 1    | 1.1   | 2.21 | 0    | 0    | 32     | 2.21  | 45.52                | 7     | 1    | 0    | 34.21 | 0    | 3.31  |
| L11711/H11778          | 169              | 67                 | 80                                     | 0.007065 | 1.09        | 1                           | 1     | 12    | 0    | 0    | 0    | 1.09  | 0    | 0    | 0    | 62.34  | 8.75  | 86.18                | 13    | 0    | 1    | 71.09 | 0    | 1.09  |
| L12233/H12315          | 79               | 81                 | 31                                     | 0.004845 | 1.45        | 0                           | 1     | 2     | 0    | 0    | 0    | 0     | 0    | 0    | 0    | 34.91  | 5.82  | 43.73                | 3     | 0    | 0    | 40.73 | 0    | 0     |
| L12283/H12398          | 42               | 95                 | 33                                     | 0.008271 | 1.44        | 1                           | 5     | 2     | 0    | 0    | 0    | 0     | 0    | 0    | 0    | 34.46  | 1.44  | 43.9                 | 7     | 0    | 1    | 35.9  | 0    | 0     |
| L12370/H12449          | 111              | 78                 | 78                                     | 0.009009 | 1.52        | 1                           | 7     | 8     | 2    | 0    | 0    | 0     | 0    | 0    | 0    | 89.45  | 1.52  | 108.97               | 15    | 0    | 3    | 90.97 | 0    | 0     |
| L14097/H14204          | 1030             | 106                | 853                                    | 0.007813 | 1.65        | 6                           | 66    | 60    | 2    | 1    | 4    | 34.65 | 3.3  | 1.65 | 0    | 1112.1 | 26.4  | 1317.1               | 126   | 5    | 8    | 1139  | 1.65 | 37.95 |
| L14697/H14799          | 97               | 102                | 74                                     | 0.007479 | 1.91        | 1                           | 7     | 12    | 0    | 0    | 0    | 0     | 1.91 | 0    | 0    | 95.71  | 5.74  | 123.36               | 19    | 0    | 1    | 101.5 | 0    | 1.91  |
| L14752/H14869          | 118              | 116                | 91                                     | 0.006648 | 1.07        | 1                           | 5     | 2     | 0    | 0    | 1    | 0     | 0    | 0    | 0    | 79.29  | 8.57  | 96.86                | 7     | 1    | 1    | 87.86 | 0    | 0     |
| L15292/H15384          | 352              | 91                 | 401                                    | 0.012519 | 1.02        | 2                           | 12    | 25    | 0    | 0    | 2    | 0     | 3.07 | 0    | 1.02 | 349.6  | 14.31 | 409                  | 37    | 2    | 2    | 363.9 | 1.02 | 3.07  |
| L15320/H15418          | 103              | 97                 | 118                                    | 0.011811 | 1.06        | 3                           | 12    | 4     | 0    | 1    | 0    | 2.13  | 0    | 0    | 0    | 101.06 | 1.06  | 124.25               | 16    | 1    | 3    | 102.1 | 0    | 2.13  |
| L16209/H16331          | 41               | 121                | 44                                     | 0.008869 | 1.16        | 0                           | 1     | 5     | 0    | 0    | 0    | 1.16  | 0    | 0    | 0    | 42.95  | 0     | 50.11                | 6     | 0    | 0    | 42.95 | 0    | 1.16  |
| L16303/H16407          | 161              | 103                | 132                                    | 0.007960 | 1.02        | 4                           | 7     | 12    | 0    | 1    | 0    | 3.06  | 1.02 | 0    | 2.04 | 100.94 | 3.06  | 134.12               | 19    | 1    | 4    | 104   | 2.04 | 4.08  |
| L16347/H16473          | 174              | 125                | 162                                    | 0.007448 | 0.67        | 0                           | 9     | 6     | 0    | 0    | 0    | 0     | 2    | 0    | 0    | 128    | 22    | 167                  | 15    | 0    | 0    | 150   | 0    | 2     |
| L16429/H16537          | 123              | 107                | 69                                     | 0.005243 | 0.95        | 0                           | 5.29  | 13.75 | 0    | 0    | 0    | 0     | 2    | 0    | 0    | 30     | 19    | 70.04                | 19.04 | 0    | 0    | 49    | 0    | 2     |

NOTE. — Mitochondrial fragments are numbered with reference to the Cambridge reference sequence (rCRS)[28].
