# Supplementary material for: Characterization of Nucleotide Misincorporation Patterns in the Iceman's Mitochondrial DNA
Source: PubMed Central journal article supplement (PMC2799664; doi:10.1371/journal.pone.0008629), 2010-01-08
Supplement: pone.0008629.s002.pdf [file pone.0008629.s002.pdf]

**Table S2. Modern sequences nucleotide misincorporation calculations and nucleotide misincorporation rate within each mitochondrial fragment.**

| Mitochondrial fragment | Number of clones | Length of fragment | Number of nucleotide misincorporations | <i>m</i> | AT/GC Ratio | Nucleotide misincorporation |       |       |      |      |      |      |      |      |       |       |       | Complementary Groups |            |            |            |            |            |            |
|------------------------|------------------|--------------------|----------------------------------------|----------|-------------|-----------------------------|-------|-------|------|------|------|------|------|------|-------|-------|-------|----------------------|------------|------------|------------|------------|------------|------------|
|                        |                  |                    |                                        |          |             | A→C                         | T→C   | A→G   | T→G  | A→T  | T→A  | C→A  | G→T  | C→G  | G→C   | C→T   | G→A   | Total                | A→G<br>T→C | A→T<br>T→A | A→C<br>T→G | C→T<br>G→A | C→G<br>G→C | C→A<br>G→T |
|                        |                  |                    |                                        |          |             |                             |       |       |      |      |      |      |      |      |       |       |       |                      |            |            |            |            |            |            |
| L16518/H47             | 168              | 97                 | 42                                     | 0.002577 | 1.20        | 2                           | 12    | 22    | 0    | 3    | 3    | 1.20 | 0    | 0    | 0     | 0     | 2.40  | 45.60                | 34         | 6          | 2          | 2.40       | 0          | 1.20       |
| L39/H118               | 158              | 78                 | 29                                     | 0.002353 | 0.77        | 0                           | 7.74  | 10.32 | 0    | 7.74 | 3.87 | 0    | 1    | 0    | 0     | 1     | 4     | 35.67                | 18.06      | 11.61      | 0          | 5          | 0          | 1          |
| L207/H343              | 26               | 135                | 15                                     | 0.004274 | 1.45        | 1                           | 6     | 4     | 1    | 0    | 0    | 0    | 0    | 0    | 0     | 1.45  | 2.90  | 16.35                | 10         | 0          | 2          | 4.35       | 0          | 0          |
| L707/H809              | 105              | 101                | 28                                     | 0.002640 | 0.91        | 0                           | 5.5   | 16.5  | 0    | 1.1  | 1.1  | 2    | 0    | 0    | 0     | 3     | 1     | 30.20                | 22         | 2.2        | 0          | 4          | 0          | 2          |
| L1135/H1202            | 195              | 66                 | 37                                     | 0.002875 | 1.00        | 1                           | 7     | 19    | 0    | 1    | 5    | 1    | 0    | 0    | 0     | 3     | 1     | 38                   | 26         | 6          | 1          | 4          | 0          | 1          |
| L1170/H1211            | 339              | 40                 | 45                                     | 0.003319 | 0.82        | 1.22                        | 28.06 | 6.1   | 2.44 | 0    | 1.22 | 0    | 0    | 0    | 0     | 9     | 4     | 52.04                | 34.16      | 1.22       | 3.66       | 13         | 0          | 0          |
| L1177/H1238            | 280              | 61                 | 34                                     | 0.001991 | 1.03        | 1                           | 8     | 10    | 1    | 0    | 0    | 1.03 | 0    | 1.03 | 0     | 9.30  | 3.10  | 34.46                | 18         | 0          | 2          | 12.4       | 1.03       | 1.03       |
| L1361/H1493            | 149              | 131                | 36                                     | 0.001844 | 1.10        | 1                           | 7     | 20    | 0    | 0    | 0    | 1.10 | 0    | 0    | 1.097 | 5.48  | 1.10  | 36.77                | 27         | 0          | 1          | 6.58       | 1.10       | 1.10       |
| L1720/H1833            | 144              | 112                | 49                                     | 0.003038 | 1.87        | 2                           | 7     | 24    | 0    | 3    | 0    | 0    | 0    | 0    | 0     | 16.85 | 7.49  | 60.34                | 31         | 3          | 2          | 24.33      | 0          | 0          |
| L2643/H2746            | 52               | 112                | 20                                     | 0.003434 | 1.24        | 0                           | 4     | 7     | 1    | 2    | 1    | 0    | 0    | 0    | 0     | 1.24  | 4.96  | 21.20                | 11         | 3          | 1          | 6.2        | 0          | 0          |
| L3380/H3497            | 172              | 116                | 53                                     | 0.002656 | 1.04        | 3                           | 7     | 23    | 0    | 4    | 3    | 1.04 | 0    | 1.04 | 0     | 5.18  | 6.21  | 53.47                | 30         | 7          | 3          | 11.39      | 1.04       | 1.04       |
| L3477/H3530            | 364              | 52                 | 36                                     | 0.001902 | 0.79        | 2.52                        | 8.82  | 10.08 | 0    | 2.52 | 1.26 | 3    | 0    | 0    | 0     | 11    | 2     | 41.20                | 18.9       | 3.78       | 2.52       | 13         | 0          | 3          |
| L4687/H4776            | 770              | 88                 | 123                                    | 0.001815 | 2.14        | 4                           | 37    | 43    | 0    | 10   | 7    | 2.14 | 0    | 0    | 0     | 32.14 | 12.9  | 148.18               | 80         | 17         | 4          | 45         | 0          | 2.14       |
| L4730/H4849            | 41               | 119                | 12                                     | 0.002460 | 1.38        | 0                           | 3     | 6     | 0    | 1    | 0    | 1.38 | 0    | 0    | 0     | 0     | 1.38  | 12.76                | 9          | 1          | 0          | 1.38       | 0          | 1.38       |
| L6951/H7074            | 227              | 122                | 51                                     | 0.001842 | 1.30        | 1                           | 24    | 8     | 1    | 4    | 11   | 0    | 0    | 0    | 0     | 0     | 2.60  | 51.60                | 32         | 15         | 2          | 2.604      | 0          | 0          |
| L6999/H7107            | 253              | 107                | 55                                     | 0.002032 | 1.33        | 1                           | 36    | 17    | 1    | 0    | 2    | 0    | 0    | 0    | 0     | 7.96  | 2.65  | 67.61                | 53         | 2          | 2          | 10.61      | 0          | 0          |
| L8081/H8165            | 252              | 83                 | 53                                     | 0.002534 | 1.08        | 4                           | 10    | 21    | 1    | 1    | 4    | 3.23 | 0    | 0    | 0     | 13.98 | 2.15  | 60.36                | 31         | 5          | 5          | 16.13      | 0          | 3.23       |
| L8776/H8872            | 155              | 95                 | 22                                     | 0.001494 | 0.94        | 0                           | 6.42  | 4.28  | 0    | 3.21 | 2.14 | 2    | 0    | 0    | 0     | 3     | 2     | 23.05                | 10.7       | 5.35       | 0          | 5          | 0          | 2          |
| L8840/H8932            | 223              | 91                 | 60                                     | 0.002957 | 1.02        | 0                           | 10    | 16    | 0    | 1    | 1    | 0    | 0    | 4.09 | 0     | 17.38 | 11.24 | 60.71                | 26         | 2          | 0          | 28.62      | 4.09       | 0          |
| L9027/H9105            | 122              | 77                 | 24                                     | 0.002555 | 1.26        | 1                           | 9     | 3     | 0    | 1    | 3    | 2.53 | 1.26 | 0    | 0     | 5.06  | 0     | 25.85                | 12         | 4          | 1          | 5.06       | 0          | 3.79       |
| L9612/H9715            | 184              | 102                | 35                                     | 0.001865 | 1.76        | 0                           | 9     | 19    | 0    | 2    | 1    | 1.76 | 0    | 0    | 0     | 1.76  | 3.51  | 38.03                | 28         | 3          | 0          | 5.27       | 0          | 1.76       |
| L9678/H9740            | 404              | 61                 | 51                                     | 0.002069 | 1.90        | 0                           | 20    | 16    | 2    | 1    | 4    | 1.90 | 0    | 1.9  | 0     | 5.71  | 5.71  | 58.22                | 36         | 5          | 2          | 11.43      | 1.90       | 1.90       |
| L9696/H9785            | 185              | 88                 | 32                                     | 0.001966 | 1.32        | 0                           | 17    | 8     | 0    | 0    | 2    | 2.63 | 0    | 0    | 0     | 2.63  | 1.31  | 33.57                | 25         | 2          | 0          | 3.95       | 0          | 2.63       |
| L10377/H10500          | 88               | 122                | 23                                     | 0.002142 | 2.81        | 0                           | 6     | 8     | 1    | 4    | 0    | 0    | 0    | 0    | 0     | 5.63  | 5.63  | 30.26                | 14         | 4          | 1          | 11.25      | 0          | 0          |
| L10476/H10599          | 193              | 122                | 48                                     | 0.002039 | 1.98        | 0                           | 23    | 19    | 1    | 0    | 2    | 0    | 0    | 0    | 0     | 3.95  | 1.98  | 50.93                | 42         | 2          | 1          | 5.93       | 0          | 0          |
| L10545/H10646          | 384              | 100                | 74                                     | 0.001927 | 1.44        | 1                           | 21    | 21    | 3    | 7    | 5    | 1.44 | 0    | 0    | 0     | 14.39 | 7.20  | 81.03                | 42         | 12         | 4          | 21.59      | 0          | 1.44       |
| L11261/H11325          | 450              | 63                 | 49                                     | 0.001728 | 1.33        | 0                           | 12    | 22    | 1    | 3    | 2    | 1.33 | 1.33 | 0    | 1.33  | 5.33  | 2.67  | 51.99                | 34         | 5          | 1          | 8          | 1.33       | 2.67       |
| L11274/H11381          | 336              | 106                | 96                                     | 0.002695 | 1.79        | 1                           | 26    | 34    | 3    | 8    | 7    | 3.58 | 0    | 1.79 | 0     | 12.53 | 12.53 | 109.43               | 60         | 15         | 4          | 25.05      | 1.79       | 3.58       |
| L11408/H11536          | 68               | 108                | 8                                      | 0.001089 | 1.08        | 0                           | 3     | 3     | 0    | 0    | 0    | 1.08 | 0    | 0    | 0     | 1.08  | 0     | 8.16                 | 6          | 0          | 0          | 1.08       | 0          | 1.08       |
| L11456/H11536          | 142              | 79                 | 34                                     | 0.003031 | 1.26        | 0                           | 6     | 19    | 0    | 1    | 3    | 1.26 | 0    | 0    | 0     | 2.51  | 2.51  | 35.28                | 25         | 4          | 0          | 5.03       | 0          | 1.26       |
| L11620/H11742          | 117              | 122                | 21                                     | 0.001471 | 1.07        | 0                           | 7     | 7     | 0    | 0    | 1    | 0    | 0    | 0    | 0     | 4.27  | 2.14  | 21.41                | 14         | 1          | 0          | 6.41       | 0          | 0          |
| L11711/H11778          | 352              | 67                 | 59                                     | 0.002502 | 1.03        | 1                           | 20    | 21    | 1    | 0    | 5    | 0    | 0    | 1.03 | 0     | 10.30 | 6.18  | 65.51                | 41         | 5          | 2          | 16.49      | 1.03       | 0          |
| L12233/H12315          | 134              | 81                 | 21                                     | 0.001935 | 1.53        | 3                           | 4     | 9     | 0    | 1    | 2    | 0    | 0    | 0    | 0     | 1.53  | 1.53  | 22.06                | 13         | 3          | 3          | 3.06       | 0          | 0          |
| L12283/H12398          | 130              | 95                 | 27                                     | 0.002186 | 1.44        | 1                           | 9     | 6     | 0    | 2    | 2    | 2.87 | 0    | 0    | 0     | 7.18  | 0     | 30.05                | 15         | 4          | 1          | 7.18       | 0          | 2.87       |
| L12370/H12449          | 52               | 78                 | 17                                     | 0.004191 | 1.44        | 0                           | 5     | 6     | 1    | 1    | 0    | 0    | 0    | 0    | 0     | 5.75  | 0     | 18.75                | 11         | 1          | 1          | 5.75       | 0          | 0          |
| L14097/H14204          | 170              | 106                | 36                                     | 0.001998 | 1.59        | 3                           | 15    | 12    | 2    | 2    | 0    | 0    | 0    | 0    | 0     | 12.68 | 0     | 46.68                | 27         | 2          | 5          | 12.68      | 0          | 0          |
| L14697/H14799          | 238              | 102                | 80                                     | 0.003295 | 1.91        | 7                           | 16    | 37    | 1    | 3    | 2    | 3.83 | 0    | 1.91 | 1.914 | 13.40 | 5.74  | 92.79                | 53         | 5          | 8          | 19.14      | 3.83       | 3.83       |
| L14752/H14869          | 227              | 116                | 45                                     | 0.001709 | 1.07        | 1                           | 14    | 14    | 0    | 2    | 0    | 2.14 | 0    | 0    | 0     | 10.71 | 2.14  | 45.99                | 28         | 2          | 1          | 12.86      | 0          | 2.14       |
| L15292/H15384          | 183              | 91                 | 40                                     | 0.002402 | 1.02        | 1                           | 10    | 15    | 1    | 3    | 1    | 0    | 0    | 1.02 | 1.022 | 3.07  | 4.09  | 40.20                | 25         | 4          | 2          | 7.16       | 2.04       | 0          |
| L15320/H15418          | 245              | 97                 | 41                                     | 0.001725 | 1.06        | 4                           | 9     | 13    | 0    | 0    | 3    | 1.06 | 0    | 0    | 0     | 10.64 | 1.06  | 41.76                | 22         | 3          | 4          | 11.70      | 0          | 1.06       |
| L16209/H16331          | 136              | 121                | 47                                     | 0.002856 | 1.16        | 1                           | 9     | 19    | 0    | 4    | 3    | 2.32 | 0    | 3.48 | 0     | 5.80  | 1.16  | 48.76                | 28         | 7          | 1          | 6.96       | 3.48       | 2.32       |
| L16303/H16407          | 204              | 103                | 45                                     | 0.002142 | 1.10        | 0                           | 11    | 21    | 0    | 2    | 1    | 0    | 1.10 | 0    | 0     | 6.61  | 3.31  | 46.02                | 32         | 3          | 0          | 9.92       | 0          | 1.1        |
| L16347/H16473          | 91               | 125                | 22                                     | 0.001934 | 0.76        | 0                           | 13.1  | 7.86  | 0    | 2.62 | 0    | 0    | 0    | 0    | 0     | 3     | 1     | 27.58                | 20.96      | 2.62       | 0          | 4          | 0          | 0          |
| L16429/H16537          | 74               | 107                | 15                                     | 0.001894 | 1.02        | 0                           | 4     | 5     | 0    | 1    | 1    | 0    | 0    | 0    | 0     | 3.06  | 1.02  | 15.08                | 9          | 2          | 0          | 4.08       | 0          | 0          |

NOTE. — Mitochondrial fragments are numbered with reference to the Cambridge reference sequence (rCRS)[28].
