# Supplementary material for: Characterization of Nucleotide Misincorporation Patterns in the Iceman's Mitochondrial DNA
Source: PubMed Central journal article supplement (PMC2799664; doi:10.1371/journal.pone.0008629), 2010-01-08
Supplement: pone.0008629.s003.pdf [file pone.0008629.s003.pdf]

**Table S3. Contaminant sequences nucleotide misincorporation rate within each mitochondrial fragment.**

| <b>Mitochondrial fragment</b> | <b>Number of clones</b> | <b>Length of fragment</b> | <b>Number of nucleotide misincorporations</b> | <b><i>m</i></b> |
|-------------------------------|-------------------------|---------------------------|-----------------------------------------------|-----------------|
| L16518/H47                    | 19                      | 97                        | 5                                             | 0.00271         |
| L1177/H1238                   | 14                      | 61                        | 3                                             | 0.00351         |
| L1720/H1833                   | 14                      | 112                       | 0                                             | 0               |
| L11261/H11325                 | 13                      | 63                        | 8                                             | 0.00977         |
| L11456/H11536                 | 29                      | 79                        | 0                                             | 0               |
| L14097/H14204                 | 22                      | 106                       | 5                                             | 0.00214         |
| L16303/H16407                 | 29                      | 103                       | 6                                             | 0.00201         |

NOTE. — Mitochondrial fragments are numbered with reference to the Cambridge reference sequence (rCRS) [28].
